# Supplementary material
Source: PubMed Central journal article supplement (PMC10630935)
Supplement: NIHMS1918899-supplement-Appendix_A__Codebook.pdf [file NIHMS1918899-supplement-Appendix_A__Codebook.pdf]

## Appendix A

### *Codebook Categories, Codes and Definitions*

| Category                          | Code                                 | Definition                                                                                                                                                |
|-----------------------------------|--------------------------------------|-----------------------------------------------------------------------------------------------------------------------------------------------------------|
| <b>Acting</b>                     | Anticipating                         | Participant describes an action taken or considered in anticipation of patient's future condition.                                                        |
|                                   | Execution evaluation                 | Participant describes checking for effective implementation of an action.                                                                                 |
|                                   | Information seeking                  | Provider takes an action with the intent of learning more about the patient's condition.                                                                  |
|                                   | Innovation                           | Participant reports that protocol is not sufficient; they innovate.                                                                                       |
|                                   | Rule in/Rule out                     | Participant describes strategy for ruling in/ruling out hypotheses.                                                                                       |
|                                   | Rule-based behavior                  | If this, then that; participant describes an action taken that is tied to a rule, protocol based; includes use of procedures in decision aids.            |
|                                   | Serial vs. concurrent implementation | Participant reports that they must prioritize, choose which thing(s) to do first; or participant describes a series of actions to achieve a certain goal. |
|                                   | Temporizing                          | Participant describes actions meant to forestall, buy time, watchful waiting, hedging, etc.                                                               |
| <b>Assessing/<br/>Recognizing</b> | Analogical reasoning                 | Participant indicates that they have seen something analogous before and made judgments based on the similar case.                                        |
|                                   | Goals                                | Participant describes goals at a particular point in time, or participant describes global goals such as "I wanted to bring BP down."                     |
|                                   | Mechanistic thinking                 | Physiologic thinking, while doing routine things tagging back to the physiology.                                                                          |
|                                   | Pattern matching                     | Participant describes a global assessment that integrates several sets of data points.<br>E.g., describes a pattern of cues and an assessment (A+B+C = D) |
|                                   | Recognition                          | Participant describes recognizing the situation or condition as familiar -- knew exactly what to do.                                                      |
|                                   | Refining the differential            | Participant describes multiple diagnostic hypotheses and how he/she is ordering and re-ordering the hypotheses in terms of likelihood.                    |
|                                   | Sensemaking                          | Participant describes specific cues and how they fit together; this could include multiple possible interpretations.                                      |

|                                         |                                                                          |                                                                                                                                                                                               |
|-----------------------------------------|--------------------------------------------------------------------------|-----------------------------------------------------------------------------------------------------------------------------------------------------------------------------------------------|
| <b>Correcting</b>                       | Frame shift                                                              | Participant describes updating a cognitive frame; choosing a different course of action or plan.                                                                                              |
| <b>Critiquing</b>                       | Confirming/disconfirming                                                 | Description of how test results or change(s) in patient condition provided confirming or disconfirming evidence to a potential diagnosis.                                                     |
|                                         | Expectancies                                                             | Participant describes expectancies, especially violated or confirmed expectancies.                                                                                                            |
|                                         | Mental simulation                                                        | Participant describes playing the situation forward, imagining potential courses of action and/or potential outcomes. This includes weighing pros and cons of different actions/frames.       |
| <b>Environmental factors</b>            | Interpersonal dynamics                                                   | Participant mentions any interpersonal dynamics that influenced decision-making and/or actions.                                                                                               |
|                                         | Power dynamics                                                           | Disagreement about hierarchy or establishing hierarchical relationships.                                                                                                                      |
|                                         | Resource constraints                                                     | Participant describes not having enough/proper resources (not enough help, lacking the right equipment, drugs, etc.).                                                                         |
|                                         | Time pressure and stress                                                 | Participant describes time pressure and/or stress.                                                                                                                                            |
|                                         | Uncertainty                                                              | Participant describes sources of uncertainty, e.g., unsure of what tools they have in the ICU, unsure of what to do, unsure of correct dose and/or treatment, unsure of particular diagnosis. |
| <b>Hindsight/Self-identified errors</b> | Errors of omission                                                       | Code for things we expected to see, but didn't or participant describes something they missed in hindsight                                                                                    |
|                                         | Fail to detect an error                                                  | Participant describes an error they recognize in hindsight but did not detect during the simulation.                                                                                          |
|                                         | Faulty re-evaluation                                                     | Participant describes re-evaluating the situation incorrectly.                                                                                                                                |
|                                         | Faulty understanding of the differential; insufficient medical knowledge | Participant reports that, in hindsight, they realize they did not understand the differential or experienced a knowledge gap                                                                  |
|                                         | Fixation                                                                 | Participant exhibits the mindset that "it has to be this;" they report that during the scenario they were too focused on one thing                                                            |
|                                         | Misinterpretation of data/information                                    | Participant reports that they misinterpreted or misunderstood some aspect of the simulated incident                                                                                           |
|                                         | No recognition of the problem                                            | Participant reports that they recognize the problem in hindsight but did not during the simulation.                                                                                           |
|                                         | Select inappropriate action                                              | Participant reports that in hindsight the action(s) they took during the scenario were inappropriate.                                                                                         |

**Problem  
detection and  
framing**

Problem detection and  
framing

Participant articulates a problem, an anomaly,  
something unexpected that requires scrutiny. Participant  
articulates a frame for the problem.

---
