# Supplementary material
Source: PubMed Central journal article supplement (PMC10630935)
Supplement: NIHMS1918899-supplement-Appendix_B__Interview_Guide.pdf [file NIHMS1918899-supplement-Appendix_B__Interview_Guide.pdf]

Appendix B: Interview Guide

## 1 Read introduction (first interview only).

*“Thank you for your help with this study. We really value your participation. Now that you’ve completed this very challenging scenario, the next step is to reflect on what you just experienced from your perspective. We are particularly interested in what stands out in your mind. **I am going to walk you through an interview process that unpacks each of the key events in this scenario.** I will ask you lots of questions as we work through this process together, but I am not testing you or trying to evaluate your performance in any way. I may interrupt you to ask clarifying questions or re-direct the conversation. I am not a clinician, and this is not a traditional simulation scenario debrief. I am only interested in understanding what you experienced and the process you went through during the scenario. **To do that, we will work together to fill out this matrix to capture the key events you experienced, your assessment at each point in time, what cues you were paying attention to, what actions you took, and any alternative actions you considered at each point in time.** We’ll start by listing a set of key events that you identify, and then we will go back and unpack each one in as much detail as we can. Do you have any questions?”*

## 2 Get 3-5 key events. Start 40 min timer.

### 1. Instruct the participant to write down 3-5 events on the timeline worksheet.

*Let’s create a high-level timeline of the scenario you just experienced. Please write down 3-5 key events or things that occurred in the scenario that stand out in your mind. Example events include:*

- *The nurse removed the dressing so I could see the condition of the wound.*
- *The patient vomited blood.*

*There should be a printed timeline worksheet for you to write down your events. Please let me know if you do not have one.*

Give participant a few minutes to write down events. Consider turning off your video. **Begin the 40-minute timer when the participant has finished writing down events.**

### 2. Share the CI matrix in the Zoom meeting.

Make sure you and the participant can still see each other.

### 3. Record the events in the matrix.

Example probes for writing the events in the matrix:

- *I want to draw a timeline.*
- *What is the first thing that stands out in this scenario?*
- *What happened next?*

If the interviewee lists things that are not events and skips around to multiple topics, there are several things you can try:

- Remind them of the definition and examples from above.  
*Events are actions or things that occurred during the scenario that stand out in your mind.*
- Reframe. *That’s really helpful. Next, I want to draw a timeline. What is the first thing that stands out in this scenario?*
- Rephrase what they’re telling you in terms of an event. *You mentioned several cues here; was this part of your patient assessment?* (“patient assessment” would become the event.)

### 4. Ask about the participant’s expectations before the scenario.

*Before we discuss the first event, what were you expecting when you walked into the room?*

Enter the response in the first cell in the matrix, but do not unpack all the way across the matrix.

#### Remember:

- “Events” are observable events. Use examples to help you and interviewee develop things to list in the first column.
- The events column is about the big picture – don’t record a lot.
- Tell the participant that you’ll go back and dive deeper into each event after you get the big picture.
- The term “timeline” may help participant think about events.

### 3 Complete matrix for each event

**Assessment** example probes:

- *At this point, what did you think was going on with the patient?*
- *What was your differential diagnosis?*
- *What was the status of the patient at this point?*

| Events    | Assessment | Cues | Actions | Alternatives |
|-----------|------------|------|---------|--------------|
| Before... |            |      |         |              |
|           |            |      |         |              |
|           |            |      |         |              |

**Cues** example probes:

- *What led you to this assessment of the patient?*
- *What specific information did you need leading up to this point?*
- *Were you paying attention to specific vitals? Which ones?*

**Actions** example probes:

- *Tell me about the actions that you took at this point.*
- *Tell me about your rationale for these actions. What about this situation made this the right action?*
- *I noticed you did x. Tell me more about that. [If they did an action but haven't discussed it yet]*
- *What problems did you experience while managing the patient?*

**Alternatives** example probes:

- *What other actions did you consider doing at this point in time?*
- *At this point what did you think was going to happen?*

### 4 Ask standardized questions (reserve 3-5 minutes for these questions & stop screen sharing)

1. *Have you seen a case like this before? How was this case similar or different?*
2. *On a scale of 1-10 (1 being very easy, 10 being very difficult), how challenging was this case?*
  - *What was the most challenging thing about this case?*
3. *On a scale of 1-10 (1 being very unrealistic, 10 being very realistic), how realistic was this case to you?*
  - *Tell me about ways in which the simulation seemed artificial in this case.*

Optional follow-ups on realism:

- *Was the time compressed in a way that felt unrealistic?*
  - *Were there unrealistic delays?*
  - *Were you constrained from doing what you would have normally done during actual patient care?*
  - *Was your communication or interaction with others in the scenario unrealistic? (if yes, how so?)*
  - *Did any of the effects (or side effects) of your actions seem unrealistic?*
  - *How did these affect the way you managed the situation?*
4. *What were the sources of uncertainty for you? What were you unsure about?*

### 5 Wrap up

- *Is there anything you have not had a chance to share that you want to add?*
- Thank participant for sharing their thoughts.
- Direct participant to begin next scenario.

**Type the Participant ID and the Session ID on the CI matrix – both IDs are on the clapper at the beginning of the sessions. You will need these to save your files.**

#### To Do:

- Do post-interview question at end of matrix.
- Save matrix as:  
SessionID\_PID\_Patientlastname\_site\_CIlastname\_CImatrix
- At end of day, send all matrices to site PI.
